# Supplementary material
Source: publisher figshare collection journal article supplement (https://aacr.figshare.com/articles/dataset/_/22389660)

**Suppl. Figure 1**

**293T**

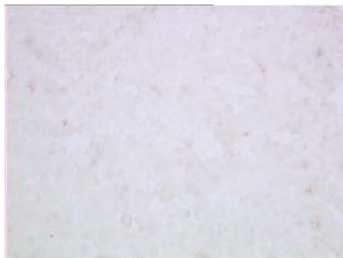

**293T-TLR3**

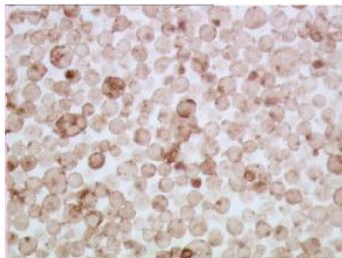

**293T-TLR4**

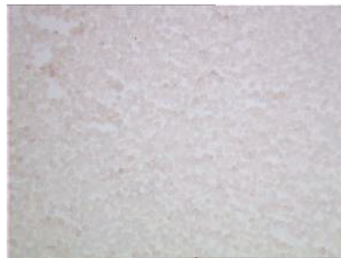

**A375**

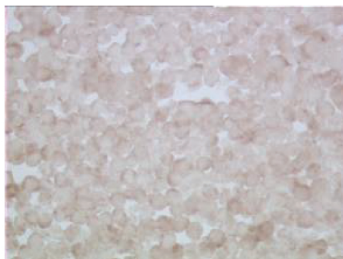

**A375 + IFN**

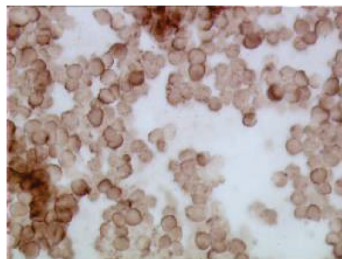

**A375-siTLR3 + IFN**

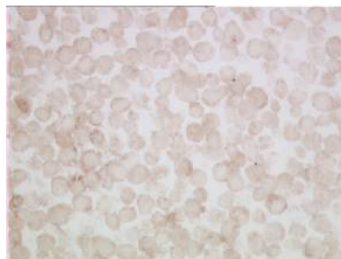

Supplement: Supplementary file 1 [file 39835176]
